# Supplementary material
Source: Springer Nature journal article supplement (https://www.springermedizin.de/resource/supplementary/12875_2012_752_MOESM1_ESM.pdf/9435320)
Supplement: MOESM1 [file 9435320]

**137,828** Charts  
of patient calls (1/11/05-1/11/06)

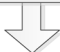

**2304** Charts  
identified as calls of palliative care  
patients by electronically search

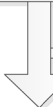

**553** Charts  
identified as palliative care patients  
by content analyses

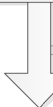

**529** Charts included

**1751** Charts excluded:  
identified as not a palliative care  
patient

**24** Charts excluded:  
patient died before GP visit or  
patient resided in a hospice
